# Supplementary material for: Genome-Wide Survey of Invertase Encoding Genes and Functional Characterization of an Extracellular Fungal Pathogen-Responsive Invertase in Glycine max
Source: PubMed Central journal article supplement (PMC6121457; doi:10.3390/ijms19082395), 2018-08-14
Supplement: ijms-19-02395-s001.pdf [file ijms-19-02395-s001.pdf]

**Table S1.** Lists of the invertase gene candidates in soybean.

| Gene           | Gmax 2.0        | fl cDNA NCBI   | Chr    | Location          | Gene Model | ORF (bp) | MW (kDa) | pI   | Target   |
|----------------|-----------------|----------------|--------|-------------------|------------|----------|----------|------|----------|
| <i>GmCW11</i>  | Glyma.07G008800 | NM_001249396.1 | Chr07: | 647865-652858     | 1          | 1695     | 63.54    | 8.84 | Apoplast |
| <i>GmCW12</i>  | Glyma.08G192000 | XM_003531563.3 | Chr08  | 15440745-15445678 | 1          | 1695     | 63.60    | 9.22 | Apoplast |
| <i>GmCW13</i>  | Glyma.15G024600 | XM_003546647.3 | Chr15  | 1992572-1996208   | 1          | 1728     | 64.39    | 8.75 | Apoplast |
| <i>GmCW14</i>  | Glyma.13G349300 | XM_003543542.3 | Chr13  | 43903578-43906955 | 2          | 1725     | 64.45    | 9.16 | Apoplast |
| <i>GmCW15</i>  | Glyma.08G191900 | n.a            | Chr08  | 15431365-15437778 | 1          | 1545     | 61.37    | 8.76 | Apoplast |
| <i>GmCW16</i>  | Glyma.14G096600 | XM_003544491.3 | Chr14  | 9045982-9049929   | 3          | 1713     | 65.09    | 5.87 | Apoplast |
| <i>GmCW17</i>  | Glyma.10G074800 | XM_003535691.3 | Chr10  | 7745865-7752555   | 1          | 1731     | 65.43    | 9.48 | Apoplast |
| <i>GmCW18</i>  | Glyma.17G227800 | XM_006601164.2 | Chr17  | 38275485-38278808 | 2          | 1689     | 64.41    | 5.08 | Per      |
| <i>GmCW19</i>  | Glyma.17G227900 | XM_003549299.3 | Chr17  | 38284476-38287851 | 2          | 1659     | 63.25    | 5.17 | Per      |
| <i>GmCW110</i> | Glyma.20G029100 | XM_003556688.3 | Chr20  | 3460364-3464727   | 2          | 1668     | 62.90    | 8.42 | PM       |
| <i>GmCW111</i> | Glyma.19G195400 | XM_003553553.3 | Chr19  | 45262941-45267834 | 1          | 1665     | 64.78    | 9.10 | Apoplast |
| <i>GmCW112</i> | Glyma.03G197400 | n.a            | Chr03  | 40681218-40685449 | 1          | 1605     | 60.40    | 8.39 | Apoplast |
| <i>GmV11</i>   | Glyma.01G211000 | XM_006573669.2 | Chr01  | 54261857-54266740 | 1          | 2028     | 75.06    | 5.43 | Chl      |
| <i>GmV12</i>   | Glyma.05G056300 | XM_003525755.3 | Chr05  | 5148962-5154038   | 3          | 1938     | 71.76    | 5.66 | PM       |
| <i>GmV13</i>   | Glyma.06G318500 | XM_003526326.3 | Chr06  | 50710931-50716437 | 2          | 1941     | 72.13    | 5.36 | PM       |
| <i>GmV14</i>   | Glyma.09G231500 | XM_003533466.3 | Chr09  | 45478768-45483760 | 2          | 1893     | 70.59    | 5.39 | PM       |
| <i>GmV15</i>   | Glyma.11G030800 | XM_003538679.3 | Chr11  | 2225720-2230176   | 1          | 1860     | 68.61    | 5.10 | Per      |
| <i>GmV16</i>   | Glyma.12G005100 | XM_003540527.3 | Chr12  | 395447-400775     | 2          | 1845     | 68.86    | 5.70 | PM       |
| <i>GmV17</i>   | Glyma.17G138500 | XM_003549854.3 | Chr17  | 11222613-11227294 | 2          | 1938     | 71.98    | 5.18 | PM       |
| <i>GmC11</i>   | Glyma.03G230400 | XM_003520741.2 | Chr03: | 43205651-43209277 | 1          | 1992     | 75.25    | 5.47 | ER/Cyto  |
| <i>GmC12</i>   | Glyma.04G005700 | XM_003523456.3 | Chr04: | 460114-463655     | 5          | 1713     | 65.24    | 6.78 | Per/PM   |
| <i>GmC13</i>   | Glyma.05G185500 | XM_014775774.1 | Chr05: | 37243691-37249494 | 4          | 1959     | 74.10    | 6.39 | Mit/PM   |
| <i>GmC14</i>   | Glyma.06G005400 | XM_006581041.2 | Chr06  | 446722-450595     | 2          | 1722     | 65.39    | 6.34 | Per/PM   |
| <i>GmC15</i>   | Glyma.07G236000 | XM_003529455.3 | Chr07: | 41783573-41788799 | 1          | 2040     | 77.00    | 6.13 | Chl/PM   |
| <i>GmC16</i>   | Glyma.08G143500 | XM_003531340.3 | Chr08: | 10949673-10956219 | 1          | 1959     | 73.87    | 5.84 | Mit/PM   |
| <i>GmC17</i>   | Glyma.10G145600 | XM_003535267.3 | Chr10: | 38035440-38039395 | 1          | 1956     | 73.73    | 6.59 | Chl      |
| <i>GmC18</i>   | Glyma.10G214700 | XM_014763320.1 | Chr10: | 44674211-44679453 | 4          | 1668     | 63.21    | 6.11 | PM       |
| <i>GmC19</i>   | Glyma.12G024000 | XM_014764424.1 | Chr12: | 1748002-1751739   | 3          | 1674     | 63.58    | 6.02 | PM       |
| <i>GmC110</i>  | Glyma.17G037400 | XM_003550769.3 | Chr17: | 2732048-2737399   | 2          | 2043     | 77.02    | 5.94 | Chl      |
| <i>GmC111</i>  | Glyma.19G227300 | XM_006605197.2 | Chr19: | 47882570-47886680 | 1          | 2016     | 76.01    | 5.43 | Cyto     |
| <i>GmC112</i>  | Glyma.20G095200 | XM_003555130.3 | Chr20  | 33827363-33831352 | 1          | 1959     | 73.84    | 6.79 | Cyto/Chl |
| <i>GmC113</i>  | Glyma.20G177200 | XM_014772800.1 | Chr20: | 41446962-41451980 | 2          | 1668     | 63.25    | 6.22 | Per/Chl  |

fl cDNA, full length complementary DNA; Chr, chromosome; ORF, open reading frame; MW, deduced molecular weight of the protein; pI, isoelectric point; Per, Peroxisome; PM, Plasma Membrane; Chl, Chloroplast; ER, Endoplasmic Reticulum; Cyto, Cytosol; Mit, Mitochondria; n.a, not applicable. The gene ID was obtained from the genome assembly nomenclature of Glyma.Wm82.a2 in Soybase database (<https://soybase.org/>). Predictions of protein subcellular targeting were performed by programs of PSORT (<https://wolfsort.hgc.jp/>) and CELLO (<http://cello.life.nctu.edu.tw/>). Protein molecular weight (MW) and isoelectric point (pI) were deduced by the program of ExPASy ([http://web.expasy.org/compute\\_pi/](http://web.expasy.org/compute_pi/)).

**Table S2.** The lists of primers were used for qRT-PCR, subcellular localization and protein expression.

**qRT-PCR**

| Gene            | Gene ID NCBI  | Gene ID 2.0       | Primers                                                     | Size   |
|-----------------|---------------|-------------------|-------------------------------------------------------------|--------|
| <i>GmEF/ab</i>  | EV279336      | Glyma.02G276600.1 | F1: CCACTGCTGAAGAAGATGATGATG<br>R1: AAGGACAGAAGACTTGCCACTC  | 182 bp |
| <i>GmCYP</i>    | CF806591      | Glyma.12G024700.1 | F1: ACGACGAAGACGGAGTGG<br>R1: CGACGACGACAGGCTTGG            | 121 bp |
| <i>GmACTII</i>  | BW652479      | Glyma.02G091900.1 | F1: ATCTTGACTGAGCGTGGTTATTCC<br>R1: GCTGGTCCCTGGCTGTCTCC    | 161 bp |
| <i>GmACT2/7</i> | BW677100      | Glyma.04G215900.1 | F1: CTTCCCTCAGCACCTTCCAA<br>R1: GGTCAGCTTTTCACACTCCAT       | 198 bp |
| <i>GmCWI1</i>   | Glyma07g01090 | Glyma.07G008800.1 | F1: TTGACTTCTTCTACTGATGCCTCT<br>R1: ACGTTGGTGGCAAGTGTCAG    | 162 bp |
| <i>GmCWI2</i>   | Glyma08g20490 | Glyma.08G192000.1 | F1: AGCAATTGCCATGACTATGTCTA<br>R1: GGGAGGTTGGAAGTGATAAGCA   | 157 bp |
| <i>GmCWI3</i>   | Glyma15g02850 | Glyma.15G024600.1 | F1: ACCATAGTGCTTGTTATTCAAGT<br>R1: ACTGAGTAAAAATTGTTCCCTGCC | 182 bp |
| <i>GmCWI4</i>   | Glyma13g42530 | Glyma.13G349300.1 | F1: AGTGCCTGCAAATTCATTACTGT<br>R1: GTTGACAGGCCTCTAAAACCT    | 121 bp |
| <i>GmCWI5</i>   | Glyma08g20480 | Glyma.08G191900.1 | F1: ACTGCTTATCATTTCACCAGC<br>R1: AGTGGGGTCCAGTTCACAAG       | 161 bp |
| <i>GmCWI6</i>   | Glyma14g11000 | Glyma.14G096600.1 | F1: ACAGAATTGGATGAATGGGCCT<br>R1: GAGCCTGACCAGCAGCTATT      | 198 bp |
| <i>GmCWI7</i>   | Glyma10g08670 | Glyma.10G074800.1 | F1: TGGATACCATTTTCAACCTCGTAA<br>R1: TCCTTTGATACTGCGTGTCCC   | 147 bp |
| <i>GmCWI8</i>   | Glyma17g34570 | Glyma.17G227800.1 | F1: TATCACTGCATCACAGGCCG<br>R1: CTGCAGTGTGTCTGTTTGGT        | 191 bp |
| <i>GmCWI9</i>   | Glyma17g34590 | Glyma.17G227900.1 | F1: TGAGTTTGTCTTTGCGTGT<br>R1: CACCTACCACTCTGAGAAAAATGC     | 173 bp |
| <i>GmCWI10</i>  | Glyma20g03620 | Glyma.20G029100.1 | F1: TGATACTATGAGCATCCCCTACAT<br>R1: GGAGAAGTTGACCGAGGCTT    | 166 bp |
| <i>GmCWI11</i>  | Glyma19g38160 | Glyma.19G195400.1 | F1: ACTGGATCAACGGCTCAGTG<br>R1: CTATGGTGGCTGACCCAGAC        | 147 bp |
| <i>GmCWI12</i>  | Glyma03g35520 | Glyma.03G197400.1 | F1: GCAAGCCAAACATCCGATCC<br>R1: GACGTCTCCAACCCTGCATT        | 102 bp |
| <i>GmVI1</i>    | Glyma01g41990 | Glyma.01G211000.1 | F1: TAAGGGATGAGGGACTCGCA<br>R1: ATGACTCCCATTCAGCAGC         | 152 bp |
| <i>GmVI2</i>    | Glyma05g04290 | Glyma.05G056300.1 | F1: TCTGCCAAAGTGCCAAGTCA<br>R1: AGAAGGTCCTTGCGAGTGTG        | 188 bp |
| <i>GmVI3</i>    | Glyma06g47640 | Glyma.06G318500.1 | F1: GGGTCGCAATTGGGTCAAAG<br>R1: TACCCGGAACCGCATGTAAG        | 111 bp |
| <i>GmVI4</i>    | Glyma09g36580 | Glyma.09G231500.1 | F1: ACTGGATGAACGGTCCATTG<br>R1: GCTGACCCTGACCATAACCC        | 193 bp |
| <i>GmVI5</i>    | Glyma11g03360 | Glyma.11G030800.1 | F1: GGATGAACGGTCCAATGTTCT<br>R1: ACAGCGTGTCCCCAACTAT        | 100 bp |
| <i>GmVI6</i>    | Glyma12g00780 | Glyma.12G005100.1 | F1: CCTGACAATTGTTTCTCCAGCG<br>R1: TCCAAAGAAAGCTGAGTGCCA     | 169 bp |
| <i>GmVI7</i>    | Glyma17g14750 | Glyma.17G138500.1 | F1: TAAAATGTGCCAATGTGAGCC<br>R1: GTTATGACTTGGCCCCAACTTT     | 114 bp |

**Co-localization**

| Gene                        | Primers                                                                                                                  |
|-----------------------------|--------------------------------------------------------------------------------------------------------------------------|
| <i>GmCWI4-pK7RWG/pB7YWG</i> | CWI4-attB1: GGGGACAAGTTTGTACAAAAAAGCAGGCTCCATGGCCATATCTCCAA<br>CWI4-attB2: GGGGACCACTTTGTACAAGAAAGCTGGGTGTTGATTTTTGCCTTC |
| <i>attB1</i>                | attB1_adapter:GGGGACAAGTTTGTACAAAAAAGCAGGCT                                                                              |
| <i>attB2</i>                | attB2_adapter:GGGGACCACTTTGTACAAGAAAGCTGGGT                                                                              |
| <i>pDONR201</i>             | SeqLA: TCGCGTTAACGCTAGCATGGATCTC<br>SeqLB: GTAACATCAGAGATTTGAGACAC                                                       |

## Pichia expression

| Gene                  | Primers                                                                                                                             |
|-----------------------|-------------------------------------------------------------------------------------------------------------------------------------|
| <i>GmCW14-pMDC32</i>  | CW14-attB1: GGGGACAAGTTTGTACAAAAAAGCAGGCTCCATGGCCATATCTCCAA<br>CW14-attB2+:<br>GGGGACCACTTGTACAAGAAAGCTGGCTCGTTCAGTTGATTTTGCCTTCTTC |
| <i>GmCW14-pPICZaA</i> | CW14pPICZ-F1: AATCCGGAATTCTCTCAATGGTGTCTTCCCATTG<br>CW14pPICZ-R1: GACTAGTCTAGACCTCAGTTGATTTTGCCTTCTTC                               |
| <i>pPICZaA</i>        | 5' AOX1:GACTGGTTCCAATTGACAAGC<br>3' AOX1:GCAAATGGCATTCTGACATCC                                                                      |
| <i>pDONRZeo</i>       | M13-fw: GTAAAACGACGGCCAGT<br>M13-rev: GGAAACAGCTATGACCATG                                                                           |

|         | (1) $\beta$ -Fructosidase motif (3)    | (4)        | (5)                                |     |
|---------|----------------------------------------|------------|------------------------------------|-----|
| GmCw11  | HV-----YRNQLQSSDSS-SNQPRTA             | YHFLFYCNPF | VAHWSKDLVNWNTPLDPAIFPSQSDINGCWSGSA | 132 |
| GmCw12  | HI-----YRNQLQSSDSS-SNQPRTA             | YHFLFYCNPF | VAHWSKDLVNWNTPLDPAIFPSQSDINGCWSGSA | 132 |
| GmCw13  | HI-----YRNQLQSSDSS-SNQPRTA             | YHFLFYCNPF | VAHWSKDLVNWNTPLDPAIFPSQSDINGCWSGSA | 138 |
| GmCw14  | HI-----YRNQLQSSDSS-SNQPRTA             | YHFLFYCNPF | VAHWSKDLVNWNTPLDPAIFPSQSDINGCWSGSA | 137 |
| GmCw15  | YL-----YRNQLQSSDSS-SNQPRTA             | YHFLFYCNPF | VAHWSKDLVNWNTPLDPAIFPSQSDINGCWSGSA | 133 |
| GmCw16  | GI-----YRDLQSIINRRTPEKQYRTS            | YHFLFYCNPF | VAHWSKDLVNWNTPLDPAIFPSQSDINGCWSGSA | 131 |
| GmCw17  | DI-----EPTDQSIISARS-SKLQRTQ            | YHFLFYCNPF | VAHWSKDLVNWNTPLDPAIFPSQSDINGCWSGSA | 139 |
| GmCw18  | AS-----PHSINSIKFKVPEKQYRTS             | YHFLFYCNPF | VAHWSKDLVNWNTPLDPAIFPSQSDINGCWSGSA | 121 |
| GmCw19  | AS-----PDNINSVYVNHKQYRTS               | YHFLFYCNPF | VAHWSKDLVNWNTPLDPAIFPSQSDINGCWSGSA | 118 |
| GmCw110 | ---YRDLQSIINRRTPEKQYRTS                | YHFLFYCNPF | VAHWSKDLVNWNTPLDPAIFPSQSDINGCWSGSA | 126 |
| GmCw111 | KV-----YPHLQSVSTISV-SRQHRTA            | YHFLFYCNPF | VAHWSKDLVNWNTPLDPAIFPSQSDINGCWSGSA | 136 |
| GmCw112 | KV-----YPHLQSVSTISV-SRQHRTA            | YHFLFYCNPF | VAHWSKDLVNWNTPLDPAIFPSQSDINGCWSGSA | 136 |
| GmV11   | ---SWLNSNNGNGEYSPWNNSMLSWRTA           | YHFLFYCNPF | VAHWSKDLVNWNTPLDPAIFPSQSDINGCWSGSA | 203 |
| GmV12   | SSMLFAVDGAKGAFYFNWNSMLSWRTA            | YHFLFYCNPF | VAHWSKDLVNWNTPLDPAIFPSQSDINGCWSGSA | 235 |
| GmV13   | NPFELQ-----KVSYNNTNAMSWSRTA            | YHFLFYCNPF | VAHWSKDLVNWNTPLDPAIFPSQSDINGCWSGSA | 193 |
| GmV14   | NFLYSQ-----KASYNNTNAMSWSRTA            | YHFLFYCNPF | VAHWSKDLVNWNTPLDPAIFPSQSDINGCWSGSA | 209 |
| GmV15   | ---SWLNSNNGNGEYSPWNNSMLSWRTA           | YHFLFYCNPF | VAHWSKDLVNWNTPLDPAIFPSQSDINGCWSGSA | 225 |
| GmV16   | NQYLSH-----KASYNNTNAMSWSRTA            | YHFLFYCNPF | VAHWSKDLVNWNTPLDPAIFPSQSDINGCWSGSA | 186 |
| GmV17   | SSMLFAVDGASEAFYFNWNSMLSWRTA            | YHFLFYCNPF | VAHWSKDLVNWNTPLDPAIFPSQSDINGCWSGSA | 205 |
| GmCw11  | I-DLLNQVQVQALPKNLSDPFLREWVSKPNLMAPTSA  | YHFLFYCNPF | VAHWSKDLVNWNTPLDPAIFPSQSDINGCWSGSA | 248 |
| GmCw12  | I-DLLNQVQVQALPKNLSDPFLREWVSKPNLMAPTSA  | YHFLFYCNPF | VAHWSKDLVNWNTPLDPAIFPSQSDINGCWSGSA | 248 |
| GmCw13  | I-DLLNQVQVQALPKNLSDPFLREWVSKPNLMAPTSA  | YHFLFYCNPF | VAHWSKDLVNWNTPLDPAIFPSQSDINGCWSGSA | 257 |
| GmCw14  | I-DLLNQVQVQALPKNLSDPFLREWVSKPNLMAPTSA  | YHFLFYCNPF | VAHWSKDLVNWNTPLDPAIFPSQSDINGCWSGSA | 256 |
| GmCw15  | I-DLLNQVQVQALPKNLSDPFLREWVSKPNLMAPTSA  | YHFLFYCNPF | VAHWSKDLVNWNTPLDPAIFPSQSDINGCWSGSA | 249 |
| GmCw16  | I-DLLNQVQVQALPKNLSDPFLREWVSKPNLMAPTSA  | YHFLFYCNPF | VAHWSKDLVNWNTPLDPAIFPSQSDINGCWSGSA | 246 |
| GmCw17  | I-DLLNQVQVQALPKNLSDPFLREWVSKPNLMAPTSA  | YHFLFYCNPF | VAHWSKDLVNWNTPLDPAIFPSQSDINGCWSGSA | 255 |
| GmCw18  | I-DLLNQVQVQALPKNLSDPFLREWVSKPNLMAPTSA  | YHFLFYCNPF | VAHWSKDLVNWNTPLDPAIFPSQSDINGCWSGSA | 235 |
| GmCw19  | I-DLLNQVQVQALPKNLSDPFLREWVSKPNLMAPTSA  | YHFLFYCNPF | VAHWSKDLVNWNTPLDPAIFPSQSDINGCWSGSA | 233 |
| GmCw110 | I-DLLNQVQVQALPKNLSDPFLREWVSKPNLMAPTSA  | YHFLFYCNPF | VAHWSKDLVNWNTPLDPAIFPSQSDINGCWSGSA | 242 |
| GmCw111 | I-DLLNQVQVQALPKNLSDPFLREWVSKPNLMAPTSA  | YHFLFYCNPF | VAHWSKDLVNWNTPLDPAIFPSQSDINGCWSGSA | 251 |
| GmCw112 | I-DLLNQVQVQALPKNLSDPFLREWVSKPNLMAPTSA  | YHFLFYCNPF | VAHWSKDLVNWNTPLDPAIFPSQSDINGCWSGSA | 247 |
| GmV11   | S-TNESVQVQVQALPKNLSDPFLREWVSKPNLMAPTSA | YHFLFYCNPF | VAHWSKDLVNWNTPLDPAIFPSQSDINGCWSGSA | 352 |
| GmV12   | S-TNESVQVQVQALPKNLSDPFLREWVSKPNLMAPTSA | YHFLFYCNPF | VAHWSKDLVNWNTPLDPAIFPSQSDINGCWSGSA | 319 |
| GmV13   | S-TNESVQVQVQALPKNLSDPFLREWVSKPNLMAPTSA | YHFLFYCNPF | VAHWSKDLVNWNTPLDPAIFPSQSDINGCWSGSA | 329 |
| GmV14   | S-TNESVQVQVQALPKNLSDPFLREWVSKPNLMAPTSA | YHFLFYCNPF | VAHWSKDLVNWNTPLDPAIFPSQSDINGCWSGSA | 307 |
| GmV15   | S-TNESVQVQVQALPKNLSDPFLREWVSKPNLMAPTSA | YHFLFYCNPF | VAHWSKDLVNWNTPLDPAIFPSQSDINGCWSGSA | 300 |
| GmV17   | S-TNESVQVQVQALPKNLSDPFLREWVSKPNLMAPTSA | YHFLFYCNPF | VAHWSKDLVNWNTPLDPAIFPSQSDINGCWSGSA | 319 |
| GmCw11  | GVDTSVNG-YDVRHVLKVSDDDKKHDYMI          | YHFLFYCNPF | VAHWSKDLVNWNTPLDPAIFPSQSDINGCWSGSA | 364 |
| GmCw12  | GVDTSVNG-YDVRHVLKVSDDDKKHDYMI          | YHFLFYCNPF | VAHWSKDLVNWNTPLDPAIFPSQSDINGCWSGSA | 364 |
| GmCw13  | GVDTSVNG-YDVRHVLKVSDDDKKHDYMI          | YHFLFYCNPF | VAHWSKDLVNWNTPLDPAIFPSQSDINGCWSGSA | 374 |
| GmCw14  | GVDTSVNG-YDVRHVLKVSDDDKKHDYMI          | YHFLFYCNPF | VAHWSKDLVNWNTPLDPAIFPSQSDINGCWSGSA | 365 |
| GmCw15  | GVDTSVNG-YDVRHVLKVSDDDKKHDYMI          | YHFLFYCNPF | VAHWSKDLVNWNTPLDPAIFPSQSDINGCWSGSA | 364 |
| GmCw16  | GVDTSVNG-YDVRHVLKVSDDDKKHDYMI          | YHFLFYCNPF | VAHWSKDLVNWNTPLDPAIFPSQSDINGCWSGSA | 374 |
| GmCw17  | GVDTSVNG-YDVRHVLKVSDDDKKHDYMI          | YHFLFYCNPF | VAHWSKDLVNWNTPLDPAIFPSQSDINGCWSGSA | 353 |
| GmCw18  | GVDTSVNG-YDVRHVLKVSDDDKKHDYMI          | YHFLFYCNPF | VAHWSKDLVNWNTPLDPAIFPSQSDINGCWSGSA | 351 |
| GmCw19  | GVDTSVNG-YDVRHVLKVSDDDKKHDYMI          | YHFLFYCNPF | VAHWSKDLVNWNTPLDPAIFPSQSDINGCWSGSA | 370 |
| GmCw110 | GVDTSVNG-YDVRHVLKVSDDDKKHDYMI          | YHFLFYCNPF | VAHWSKDLVNWNTPLDPAIFPSQSDINGCWSGSA | 364 |
| GmCw111 | GVDTSVNG-YDVRHVLKVSDDDKKHDYMI          | YHFLFYCNPF | VAHWSKDLVNWNTPLDPAIFPSQSDINGCWSGSA | 466 |
| GmCw112 | GVDTSVNG-YDVRHVLKVSDDDKKHDYMI          | YHFLFYCNPF | VAHWSKDLVNWNTPLDPAIFPSQSDINGCWSGSA | 438 |
| GmV12   | GLDTSVNG-DNVRHVLKVSDDDKKHDYMI          | YHFLFYCNPF | VAHWSKDLVNWNTPLDPAIFPSQSDINGCWSGSA | 426 |
| GmV13   | GLDTSVNG-DNVRHVLKVSDDDKKHDYMI          | YHFLFYCNPF | VAHWSKDLVNWNTPLDPAIFPSQSDINGCWSGSA | 426 |
| GmV14   | GLDTSVNG-DNVRHVLKVSDDDKKHDYMI          | YHFLFYCNPF | VAHWSKDLVNWNTPLDPAIFPSQSDINGCWSGSA | 426 |
| GmV15   | GLDTSVNG-DNVRHVLKVSDDDKKHDYMI          | YHFLFYCNPF | VAHWSKDLVNWNTPLDPAIFPSQSDINGCWSGSA | 426 |
| GmV16   | GLDTSVNG-DNVRHVLKVSDDDKKHDYMI          | YHFLFYCNPF | VAHWSKDLVNWNTPLDPAIFPSQSDINGCWSGSA | 418 |
| GmV17   | GLDTSVNG-DNVRHVLKVSDDDKKHDYMI          | YHFLFYCNPF | VAHWSKDLVNWNTPLDPAIFPSQSDINGCWSGSA | 430 |
| GmCw11  | EVEKLRAYPNVLLPQVGGKLLP                 | YHFLFYCNPF | VAHWSKDLVNWNTPLDPAIFPSQSDINGCWSGSA | 480 |
| GmCw12  | EVEKLRAYPNVLLPQVGGKLLP                 | YHFLFYCNPF | VAHWSKDLVNWNTPLDPAIFPSQSDINGCWSGSA | 480 |
| GmCw13  | EVEKLRAYPNVLLPQVGGKLLP                 | YHFLFYCNPF | VAHWSKDLVNWNTPLDPAIFPSQSDINGCWSGSA | 490 |
| GmCw14  | EVEKLRAYPNVLLPQVGGKLLP                 | YHFLFYCNPF | VAHWSKDLVNWNTPLDPAIFPSQSDINGCWSGSA | 480 |
| GmCw15  | EVEKLRAYPNVLLPQVGGKLLP                 | YHFLFYCNPF | VAHWSKDLVNWNTPLDPAIFPSQSDINGCWSGSA | 481 |
| GmCw16  | EVEKLRAYPNVLLPQVGGKLLP                 | YHFLFYCNPF | VAHWSKDLVNWNTPLDPAIFPSQSDINGCWSGSA | 481 |
| GmCw17  | EVEKLRAYPNVLLPQVGGKLLP                 | YHFLFYCNPF | VAHWSKDLVNWNTPLDPAIFPSQSDINGCWSGSA | 491 |
| GmCw18  | EVEKLRAYPNVLLPQVGGKLLP                 | YHFLFYCNPF | VAHWSKDLVNWNTPLDPAIFPSQSDINGCWSGSA | 478 |
| GmCw19  | EVEKLRAYPNVLLPQVGGKLLP                 | YHFLFYCNPF | VAHWSKDLVNWNTPLDPAIFPSQSDINGCWSGSA | 460 |
| GmCw110 | EVEKLRAYPNVLLPQVGGKLLP                 | YHFLFYCNPF | VAHWSKDLVNWNTPLDPAIFPSQSDINGCWSGSA | 487 |
| GmCw111 | EVEKLRAYPNVLLPQVGGKLLP                 | YHFLFYCNPF | VAHWSKDLVNWNTPLDPAIFPSQSDINGCWSGSA | 449 |
| GmCw112 | EVEKLRAYPNVLLPQVGGKLLP                 | YHFLFYCNPF | VAHWSKDLVNWNTPLDPAIFPSQSDINGCWSGSA | 582 |
| GmV12   | EVEKLRAYPNVLLPQVGGKLLP                 | YHFLFYCNPF | VAHWSKDLVNWNTPLDPAIFPSQSDINGCWSGSA | 554 |
| GmV13   | EVEKLRAYPNVLLPQVGGKLLP                 | YHFLFYCNPF | VAHWSKDLVNWNTPLDPAIFPSQSDINGCWSGSA | 559 |
| GmV14   | EVEKLRAYPNVLLPQVGGKLLP                 | YHFLFYCNPF | VAHWSKDLVNWNTPLDPAIFPSQSDINGCWSGSA | 559 |
| GmV15   | EVEKLRAYPNVLLPQVGGKLLP                 | YHFLFYCNPF | VAHWSKDLVNWNTPLDPAIFPSQSDINGCWSGSA | 574 |
| GmV16   | EVEKLRAYPNVLLPQVGGKLLP                 | YHFLFYCNPF | VAHWSKDLVNWNTPLDPAIFPSQSDINGCWSGSA | 523 |
| GmV17   | EVEKLRAYPNVLLPQVGGKLLP                 | YHFLFYCNPF | VAHWSKDLVNWNTPLDPAIFPSQSDINGCWSGSA | 554 |
| GmCw11  | DNDLTSYGTVDVDPD-HEKLSLRTL              | YHFLFYCNPF | VAHWSKDLVNWNTPLDPAIFPSQSDINGCWSGSA | 564 |
| GmCw12  | DNDLTSYGTVDVDPD-HEKLSLRTL              | YHFLFYCNPF | VAHWSKDLVNWNTPLDPAIFPSQSDINGCWSGSA | 564 |
| GmCw13  | DNDLTSYGTVDVDPD-HEKLSLRTL              | YHFLFYCNPF | VAHWSKDLVNWNTPLDPAIFPSQSDINGCWSGSA | 575 |
| GmCw14  | DNDLTSYGTVDVDPD-HEKLSLRTL              | YHFLFYCNPF | VAHWSKDLVNWNTPLDPAIFPSQSDINGCWSGSA | 574 |
| GmCw15  | DNDLTSYGTVDVDPD-HEKLSLRTL              | YHFLFYCNPF | VAHWSKDLVNWNTPLDPAIFPSQSDINGCWSGSA | 544 |
| GmCw16  | DNDLTSYGTVDVDPD-HEKLSLRTL              | YHFLFYCNPF | VAHWSKDLVNWNTPLDPAIFPSQSDINGCWSGSA | 572 |
| GmCw17  | DNDLTSYGTVDVDPD-HEKLSLRTL              | YHFLFYCNPF | VAHWSKDLVNWNTPLDPAIFPSQSDINGCWSGSA | 576 |
| GmCw18  | DNDLTSYGTVDVDPD-HEKLSLRTL              | YHFLFYCNPF | VAHWSKDLVNWNTPLDPAIFPSQSDINGCWSGSA | 562 |
| GmCw19  | DNDLTSYGTVDVDPD-HEKLSLRTL              | YHFLFYCNPF | VAHWSKDLVNWNTPLDPAIFPSQSDINGCWSGSA | 542 |
| GmCw110 | DNDLTSYGTVDVDPD-HEKLSLRTL              | YHFLFYCNPF | VAHWSKDLVNWNTPLDPAIFPSQSDINGCWSGSA | 555 |
| GmCw111 | DNDLTSYGTVDVDPD-HEKLSLRTL              | YHFLFYCNPF | VAHWSKDLVNWNTPLDPAIFPSQSDINGCWSGSA | 572 |
| GmCw112 | DNDLTSYGTVDVDPD-HEKLSLRTL              | YHFLFYCNPF | VAHWSKDLVNWNTPLDPAIFPSQSDINGCWSGSA | 534 |
| GmV12   | DVSKLIFGSAVPPV-LKDEKLSRVL              | YHFLFYCNPF | VAHWSKDLVNWNTPLDPAIFPSQSDINGCWSGSA | 645 |
| GmV13   | DVSKLIFGSAVPPV-LKDEKLSRVL              | YHFLFYCNPF | VAHWSKDLVNWNTPLDPAIFPSQSDINGCWSGSA | 646 |
| GmV14   | DVSKLIFGSAVPPV-LKDEKLSRVL              | YHFLFYCNPF | VAHWSKDLVNWNTPLDPAIFPSQSDINGCWSGSA | 630 |
| GmV15   | DVSKLIFGSAVPPV-LKDEKLSRVL              | YHFLFYCNPF | VAHWSKDLVNWNTPLDPAIFPSQSDINGCWSGSA | 619 |
| GmV16   | DVSKLIFGSAVPPV-LKDEKLSRVL              | YHFLFYCNPF | VAHWSKDLVNWNTPLDPAIFPSQSDINGCWSGSA | 614 |
| GmV17   | DVSKLIFGSAVPPV-LKDEKLSRVL              | YHFLFYCNPF | VAHWSKDLVNWNTPLDPAIFPSQSDINGCWSGSA | 645 |

**Figure S1.** Multiple sequence alignment of the acid invertase (CWI and VI) gene family in soybean. The boxed region indicates the 13 well-conserved regions including typical  $\beta$ -Fructosidase motif and catalytic site from the known CWI and VI of the selected green plants.

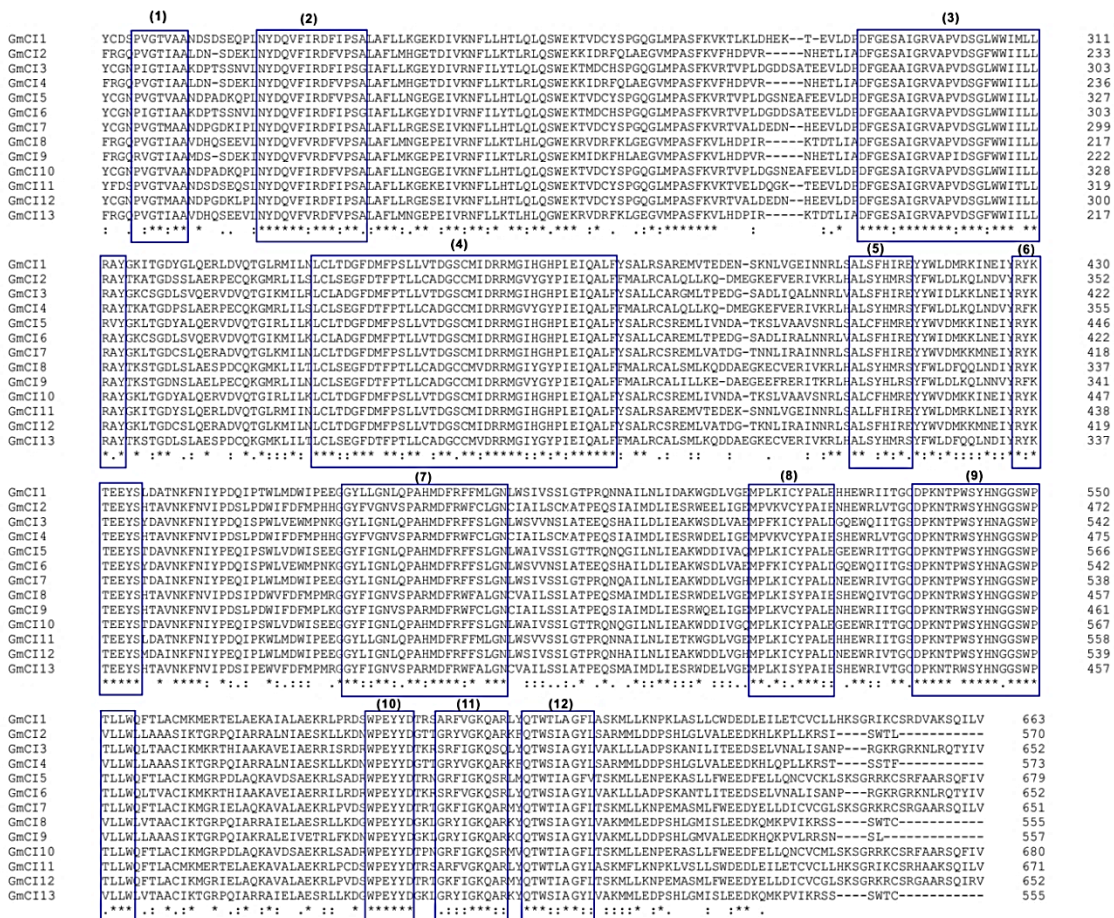

**Figure S2.** Multiple sequence alignment of the cytoplasmic invertase (CI) family in soybean. The boxed regions indicate the 12 well-conserved regions from the known CI of the selected green plants.

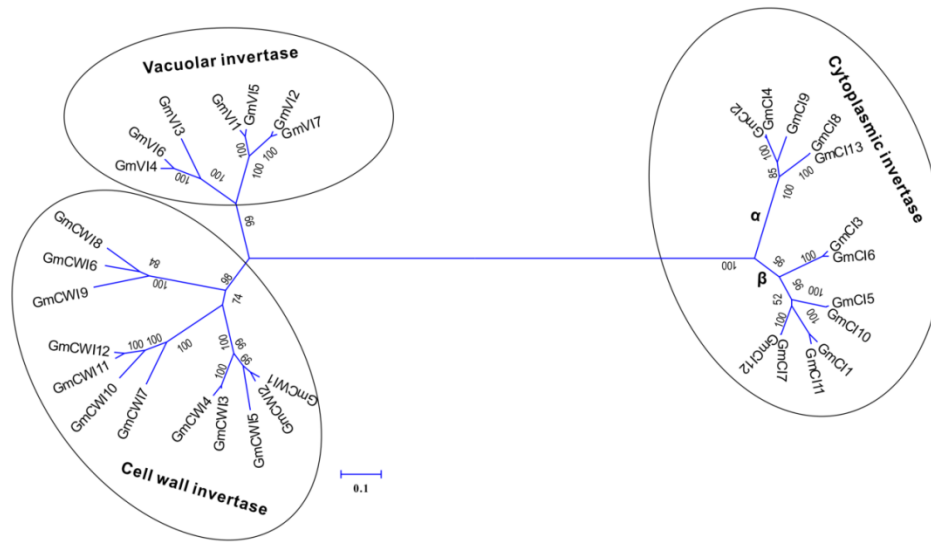

**Figure S3.** An unrooted phylogenetic tree of the soybean invertase family. The invertase family are divided into three subgroups. Phylogenetic analysis was done using neighbor-joining method in MEGA 6. The posterior probabilities have been multiplied by 100. The scale bar shows expected number of nucleotide substitutions per site.

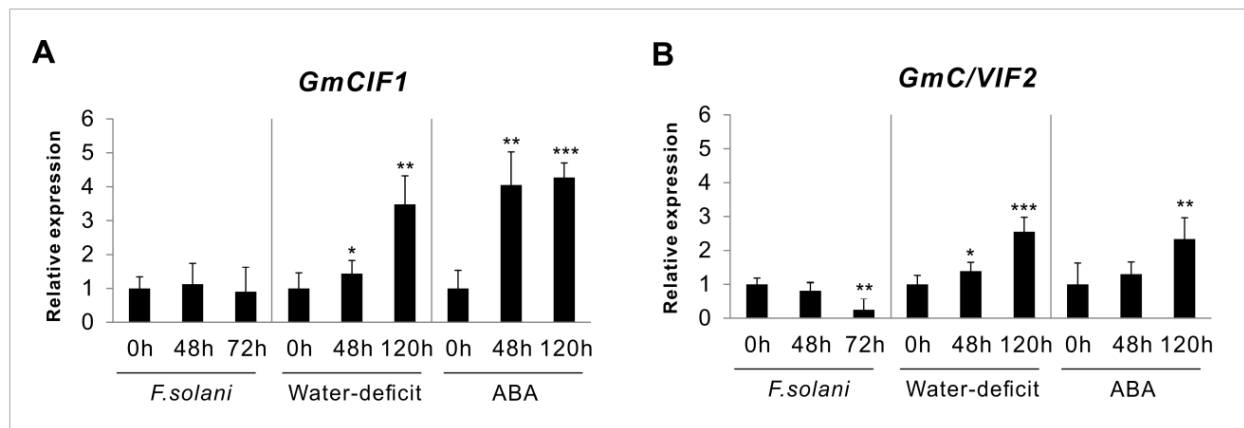

**Figure S4.** Expression detection of inhibitor genes in response to stress factors. Expressions were analyzed by qRT-PCR. Data represent mean values  $\pm$ SE of at least three independent biological replicates. *GmACT2/7*, *GmACT11*, *GmEF/ab*, and *GmCYP* were used as reference genes. Asterisks indicate significant differences in comparison with the control using Student's t-test: \*\*\* $P < 0.001$ , \*\* $P < 0.01$ , \* $P < 0.05$ .

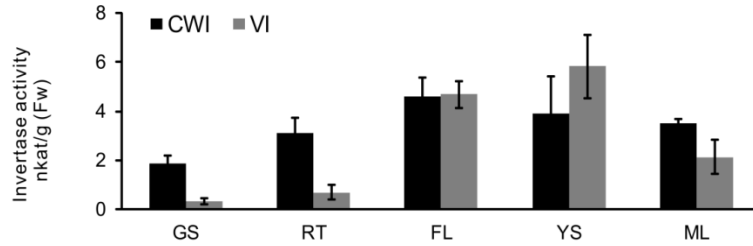

**Figure S5.** Extracted acid invertase activities in various soybean tissues. GS, 24 hours germinating seed; RT, root; FL, flower; YS, young seed; ML, mature leave. The enzyme activity data represent means  $\pm$ SE of at least four independent biological replicates.

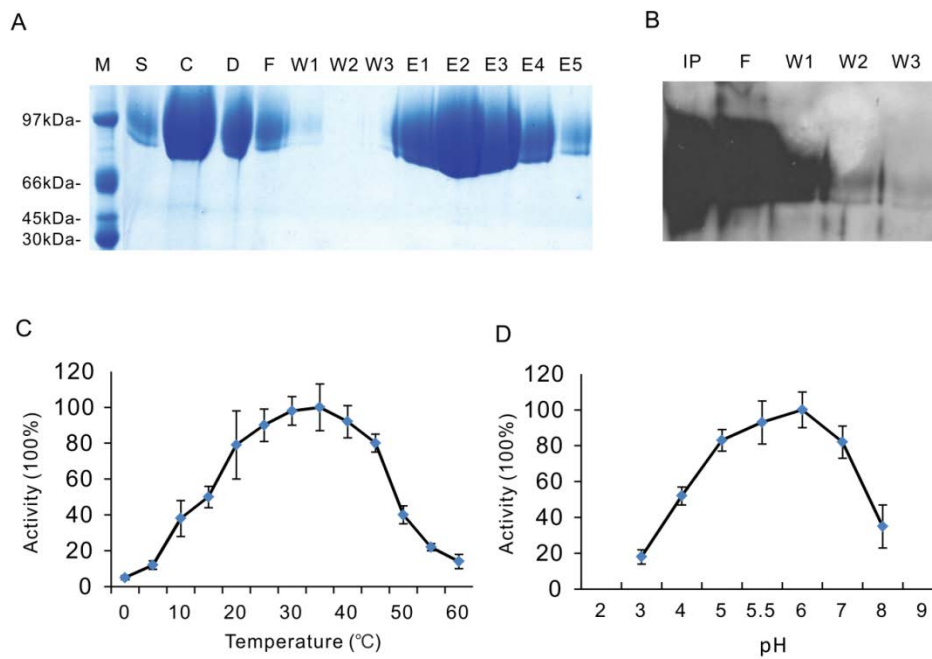

**Figure S6.** Recombinant protein purification and detection of the enzyme activities. Recombinant GmCWI4 from *Pichia pastoris* were induced and purified with culture supernatants via immobilized metal ion affinity chromatography on Ni-IDA resin, and analyzed by SDS-PAGE and Coomassie staining (a). Immunoblot analysis with a polyclonal antibody (c-Myc) was raised against a GmCWI4 protein fragment (b). Detection of enzyme activities under different incubation conditions (c, d). Data are means of three replicates. M: protein ladder, S: culture supernatant, C: concentrated culture supernatant, D: concentrated culture supernatant after dialysis, FT: column flow through, W1-3: wash steps, E1-E6: elution fractions. C Covalent coupling of purified GmCWI4 to HiTrap NHS-activated HP 5-ml column. Input: as loading control a 1:50 dilution of the actual protein solution was used, FT: column flow through, W1-7: washing steps for column inactivation. Activity is expressed as a percentage of the maximum activity calculated by the amount of fructose and glucose released after incubation of 25 $\mu$ g of recombinant GmCWI4 with 50 $\mu$ l sucrose substrate.
